# Supplementary material
Source: MDPI journal article supplement (https://www.mdpi.com/2254-9625/12/9/93)
Supplement: s1 [file s1]

**Supplementary Table S1.** Correlations among the employed variables. \*: p<.05; \*\*: p<.01; \*\*\*: p<.001.

|                                             | Age       | Gen     | U-P      | N-C      | Q-C      | EXP      | h-pand   | h-pre   | UCLA (ISO) | UCLA (RC) | UCLA (TL) | COPE (AS) | COPE (TO) | COPE (PA) | COPE (SS) | COPE (OP) | ROL      | QOL   | A-C | C-C | GHQ |
|---------------------------------------------|-----------|---------|----------|----------|----------|----------|----------|---------|------------|-----------|-----------|-----------|-----------|-----------|-----------|-----------|----------|-------|-----|-----|-----|
| Age                                         | —         |         |          |          |          |          |          |         |            |           |           |           |           |           |           |           |          |       |     |     |     |
| Gender                                      | .049      | —       |          |          |          |          |          |         |            |           |           |           |           |           |           |           |          |       |     |     |     |
| University's Policies (U-P)                 | .217***   | -0.046  | —        |          |          |          |          |         |            |           |           |           |           |           |           |           |          |       |     |     |     |
| Number of Cohabitants (N-C)                 | -.100*    | -0.005  | 0.035    | —        |          |          |          |         |            |           |           |           |           |           |           |           |          |       |     |     |     |
| Quality of Internet Connection (Q-C)        | .110**    | -0.083* | 0.049    | -0.065   | —        |          |          |         |            |           |           |           |           |           |           |           |          |       |     |     |     |
| Expertise in the Use of Devices (EXP)       | .034      | -0.000  | 0.081*   | -0.090*  | 0.232**  | —        |          |         |            |           |           |           |           |           |           |           |          |       |     |     |     |
| Use of Devices during the Pandemic (h-pand) | -.151***  | -0.058  | -0.029   | 0.091*   | -0.032   | 0.061    | —        |         |            |           |           |           |           |           |           |           |          |       |     |     |     |
| Use of Devices before the Pandemic (h-pre)  | -0.089*   | -0.060  | 0.110**  | 0.173*** | 0.022    | 0.044    | 0.664**  | —       |            |           |           |           |           |           |           |           |          |       |     |     |     |
| Isolation (UCLA ISO)                        | -0.028    | -0.042  | -0.160** | -0.010   | -0.095** | -0.063   | 0.074    | 0.019   | —          |           |           |           |           |           |           |           |          |       |     |     |     |
| Rel. Connectedness (UCLA RC)                | 0.016     | 0.030   | -0.054   | -0.003   | -0.098** | -0.041   | -0.001   | -0.064  | 0.597***   | —         |           |           |           |           |           |           |          |       |     |     |     |
| Trait Loneliness (UCLA TL)                  | -0.110**  | 0.055   | -0.200** | 0.053    | -0.121** | -0.042   | 0.017    | -0.032  | 0.486***   | 0.512***  | —         |           |           |           |           |           |          |       |     |     |     |
| Avoiding Strategy (COPE AS)                 | -0.032    | 0.018   | 0.021    | 0.065    | -0.048   | -0.006   | 0.043    | 0.053   | 0.276***   | 0.200***  | 0.235***  | —         |           |           |           |           |          |       |     |     |     |
| Transcendent Orientation (COPE TO)          | 0.201***  | 0.005   | 0.304*** | 0.055    | 0.069    | 0.033    | -0.024   | 0.078   | -0.091*    | -0.098*   | -0.094*   | 0.046     | —         |           |           |           |          |       |     |     |     |
| Positive Attitude (COPE PA)                 | 0.062     | -0.034  | 0.015    | 0.037    | 0.106*   | 0.050    | -0.032   | 0.008   | -0.219**   | -0.238**  | -0.241**  | -0.162*** | 0.092*    | —         |           |           |          |       |     |     |     |
| Social Support (COPE SS)                    | -0.080*   | -0.072  | -0.092** | 0.039    | -0.024   | -0.069   | -0.010   | -0.012  | -0.039     | -0.325**  | -0.154**  | 0.068     | 0.105**   | 0.091*    | —         |           |          |       |     |     |     |
| Orientation to Problem (COPE OP)            | 0.024     | -0.064  | -0.040   | -0.000   | 0.116*   | 0.106**  | -0.009   | -0.025  | -0.181**   | -0.182**  | -0.202**  | -0.298*** | 0.055     | 0.535***  | 0.183*    | —         |          |       |     |     |     |
| Resilience to Online Learning (ROL)         | -0.179*** | 0.066   | -0.234** | 0.057    | -0.024   | -0.035   | -0.011   | -0.084* | -0.014     | 0.015     | 0.049     | 0.028     | -0.158**  | -0.027    | 0.043     | 0.041     | —        |       |     |     |     |
| Quality of Online Learning (QOL)            | 0.155***  | -0.046  | 0.228*** | -0.003   | 0.197**  | 0.172*** | -0.104** | -0.066  | -0.199**   | -0.108**  | -0.082*   | -0.007    | 0.153***  | 0.066     | -0.010    | 0.028     | 0.249*** | —     |     |     |     |
| Number of Attended Courses (AC)             | -0.106    | 0.027   | -0.161   | 0.098    | 0.053    | -0.045   | 0.071    | 0.168   | 0.134      | 0.143     | 0.151     | 0.150     | 0.019     | 0.004     | 0.115     | 0.094     | 0.182    | 0.026 | —   |     |     |

|                                         |         |       |          |       |              |         |             |         |               |               |               |           |          |          |        |          |               |              |               |       |   |
|-----------------------------------------|---------|-------|----------|-------|--------------|---------|-------------|---------|---------------|---------------|---------------|-----------|----------|----------|--------|----------|---------------|--------------|---------------|-------|---|
| <b>Number of Completed Courses (CC)</b> | 0.080   | 0.019 | -0.106   | 0.059 | 0.055        | 0.009   | -0.192      | -0.226* | -0.080        | -0.055        | -0.151        | -0.315**  | 0.050    | 0.136    | -0.054 | 0.181    | 0.043         | -0.056       | -0.012        | —     |   |
| <b>General Health (GHQ)</b>             | 0.117** | 0.075 | 0.171*** | 0.002 | 0.130*<br>** | 0.126** | -0.089<br>* | -0.017  | -0.546**<br>* | -0.459**<br>* | -0.392**<br>* | -0.378*** | 0.137*** | 0.361*** | 0.061  | 0.342*** | -0.096*<br>** | 0.162*<br>** | -0.212<br>*** | 0.121 | — |
